# Supplementary material for: Genome sequencing of deep-sea hydrothermal vent snails reveals adaptions to extreme environments
Source: PubMed Central journal article supplement (PMC7736800; doi:10.1093/gigascience/giaa139), 2020-12-15

## Genome sequencing of deep-sea hydrothermal vent snails reveals adaptations to extreme environments

--Manuscript Draft--

|                                                      |                                                                                                                                                                                                                                                                                                                                                                                                                                                                                                                                                                                                                                                                                                                                                                                                                                                                                                                                                                                                                                                                                                                                                                                                                                                                                                                                                                                                                                                                                                                                                                                                                                                                                                                                  |                |
|------------------------------------------------------|----------------------------------------------------------------------------------------------------------------------------------------------------------------------------------------------------------------------------------------------------------------------------------------------------------------------------------------------------------------------------------------------------------------------------------------------------------------------------------------------------------------------------------------------------------------------------------------------------------------------------------------------------------------------------------------------------------------------------------------------------------------------------------------------------------------------------------------------------------------------------------------------------------------------------------------------------------------------------------------------------------------------------------------------------------------------------------------------------------------------------------------------------------------------------------------------------------------------------------------------------------------------------------------------------------------------------------------------------------------------------------------------------------------------------------------------------------------------------------------------------------------------------------------------------------------------------------------------------------------------------------------------------------------------------------------------------------------------------------|----------------|
| <b>Manuscript Number:</b>                            | GIGA-D-20-00187                                                                                                                                                                                                                                                                                                                                                                                                                                                                                                                                                                                                                                                                                                                                                                                                                                                                                                                                                                                                                                                                                                                                                                                                                                                                                                                                                                                                                                                                                                                                                                                                                                                                                                                  |                |
| <b>Full Title:</b>                                   | Genome sequencing of deep-sea hydrothermal vent snails reveals adaptations to extreme environments                                                                                                                                                                                                                                                                                                                                                                                                                                                                                                                                                                                                                                                                                                                                                                                                                                                                                                                                                                                                                                                                                                                                                                                                                                                                                                                                                                                                                                                                                                                                                                                                                               |                |
| <b>Article Type:</b>                                 | Data Note                                                                                                                                                                                                                                                                                                                                                                                                                                                                                                                                                                                                                                                                                                                                                                                                                                                                                                                                                                                                                                                                                                                                                                                                                                                                                                                                                                                                                                                                                                                                                                                                                                                                                                                        |                |
| <b>Funding Information:</b>                          | National Key R&D Programme of China (No. 2018YFC0310702)                                                                                                                                                                                                                                                                                                                                                                                                                                                                                                                                                                                                                                                                                                                                                                                                                                                                                                                                                                                                                                                                                                                                                                                                                                                                                                                                                                                                                                                                                                                                                                                                                                                                         | Dr. Xiang Zeng |
| <b>Abstract:</b>                                     | <p><b>Background</b></p> <p>The scaly-foot snail ( <i>Chrysomallon squamiferum</i> ) is highly adapted to deep-sea hydrothermal vents and drew people's interest once it was found. However, the limited information on its genome impedes related research and understanding of its adaptation to deep-sea hydrothermal vents.</p> <p><b>Findings</b></p> <p>Here, we report the whole-genome sequencing and assembly of the scaly-foot snail and another snail ( <i>Gigantopelta aegi</i> ), which inhabits similar environments. Using ONT, 10X genomic, and Hi-C technologies, we obtained a chromosome-level genome of <i>C. squamiferum</i> with an N50 size of 20.71 Mb. By constructing a phylogenetic tree, we found that these two deep-sea snails were independent of other snails, and their divergence from each other occurred approximately 66.3 million years ago. Comparative genomic analysis showed that different snails have diverse genome sizes and repeat contents. Deep-sea snails have more DNA transposons and LTRs, but fewer LINEs, than other snails. Gene family analysis revealed that deep-sea snails experienced stronger selective pressures than shallow-water snails, and the nervous system, immune system, metabolism, DNA stability, antioxidation and biomineralization-related gene families were significantly expanded in scaly-foot snails. We also found 251 class II histocompatibility antigen H2-Aa1, which uniquely exist in the <i>Gigantopelta aegi</i> genome, which is important for investigating the evolution of MHC genes.</p> <p><b>Conclusion</b></p> <p>Our study provides new insights into deep-sea snail genomes and valuable resources for further studies.</p> |                |
| <b>Corresponding Author:</b>                         | Yaolei Zhang<br>BGI<br>Qingdao, CHINA                                                                                                                                                                                                                                                                                                                                                                                                                                                                                                                                                                                                                                                                                                                                                                                                                                                                                                                                                                                                                                                                                                                                                                                                                                                                                                                                                                                                                                                                                                                                                                                                                                                                                            |                |
| <b>Corresponding Author Secondary Information:</b>   |                                                                                                                                                                                                                                                                                                                                                                                                                                                                                                                                                                                                                                                                                                                                                                                                                                                                                                                                                                                                                                                                                                                                                                                                                                                                                                                                                                                                                                                                                                                                                                                                                                                                                                                                  |                |
| <b>Corresponding Author's Institution:</b>           | BGI                                                                                                                                                                                                                                                                                                                                                                                                                                                                                                                                                                                                                                                                                                                                                                                                                                                                                                                                                                                                                                                                                                                                                                                                                                                                                                                                                                                                                                                                                                                                                                                                                                                                                                                              |                |
| <b>Corresponding Author's Secondary Institution:</b> |                                                                                                                                                                                                                                                                                                                                                                                                                                                                                                                                                                                                                                                                                                                                                                                                                                                                                                                                                                                                                                                                                                                                                                                                                                                                                                                                                                                                                                                                                                                                                                                                                                                                                                                                  |                |
| <b>First Author:</b>                                 | Yaolei Zhang                                                                                                                                                                                                                                                                                                                                                                                                                                                                                                                                                                                                                                                                                                                                                                                                                                                                                                                                                                                                                                                                                                                                                                                                                                                                                                                                                                                                                                                                                                                                                                                                                                                                                                                     |                |
| <b>First Author Secondary Information:</b>           |                                                                                                                                                                                                                                                                                                                                                                                                                                                                                                                                                                                                                                                                                                                                                                                                                                                                                                                                                                                                                                                                                                                                                                                                                                                                                                                                                                                                                                                                                                                                                                                                                                                                                                                                  |                |
| <b>Order of Authors:</b>                             | Yaolei Zhang                                                                                                                                                                                                                                                                                                                                                                                                                                                                                                                                                                                                                                                                                                                                                                                                                                                                                                                                                                                                                                                                                                                                                                                                                                                                                                                                                                                                                                                                                                                                                                                                                                                                                                                     |                |
|                                                      | Xiang Zeng                                                                                                                                                                                                                                                                                                                                                                                                                                                                                                                                                                                                                                                                                                                                                                                                                                                                                                                                                                                                                                                                                                                                                                                                                                                                                                                                                                                                                                                                                                                                                                                                                                                                                                                       |                |
|                                                      | Lingfeng Meng                                                                                                                                                                                                                                                                                                                                                                                                                                                                                                                                                                                                                                                                                                                                                                                                                                                                                                                                                                                                                                                                                                                                                                                                                                                                                                                                                                                                                                                                                                                                                                                                                                                                                                                    |                |
|                                                      | Guangyi Fan                                                                                                                                                                                                                                                                                                                                                                                                                                                                                                                                                                                                                                                                                                                                                                                                                                                                                                                                                                                                                                                                                                                                                                                                                                                                                                                                                                                                                                                                                                                                                                                                                                                                                                                      |                |

|                                                                                                                                                                                                                                                                                                                                                                                                                              |                 |
|------------------------------------------------------------------------------------------------------------------------------------------------------------------------------------------------------------------------------------------------------------------------------------------------------------------------------------------------------------------------------------------------------------------------------|-----------------|
|                                                                                                                                                                                                                                                                                                                                                                                                                              | Jie Bai         |
|                                                                                                                                                                                                                                                                                                                                                                                                                              | Jianwei Chen    |
|                                                                                                                                                                                                                                                                                                                                                                                                                              | Yue Song        |
|                                                                                                                                                                                                                                                                                                                                                                                                                              | Inge Seim       |
|                                                                                                                                                                                                                                                                                                                                                                                                                              | Congyan Wang    |
|                                                                                                                                                                                                                                                                                                                                                                                                                              | Zenghua Shao    |
|                                                                                                                                                                                                                                                                                                                                                                                                                              | Nanxi Liu       |
|                                                                                                                                                                                                                                                                                                                                                                                                                              | Haorong Lu      |
|                                                                                                                                                                                                                                                                                                                                                                                                                              | Xiaoteng Fu     |
|                                                                                                                                                                                                                                                                                                                                                                                                                              | Liping Wang     |
|                                                                                                                                                                                                                                                                                                                                                                                                                              | Xin Liu         |
|                                                                                                                                                                                                                                                                                                                                                                                                                              | Shanshan Liu    |
|                                                                                                                                                                                                                                                                                                                                                                                                                              | Zongze Shao     |
| <b>Order of Authors Secondary Information:</b>                                                                                                                                                                                                                                                                                                                                                                               |                 |
| <b>Additional Information:</b>                                                                                                                                                                                                                                                                                                                                                                                               |                 |
| <b>Question</b>                                                                                                                                                                                                                                                                                                                                                                                                              | <b>Response</b> |
| Are you submitting this manuscript to a special series or article collection?                                                                                                                                                                                                                                                                                                                                                | No              |
| <b>Experimental design and statistics</b><br><br>Full details of the experimental design and statistical methods used should be given in the Methods section, as detailed in our <a href="#">Minimum Standards Reporting Checklist</a> . Information essential to interpreting the data presented should be made available in the figure legends.<br><br>Have you included all the information requested in your manuscript? | Yes             |
| <b>Resources</b><br><br>A description of all resources used, including antibodies, cell lines, animals and software tools, with enough information to allow them to be uniquely identified, should be included in the Methods section. Authors are strongly encouraged to cite <a href="#">Research Resource Identifiers</a> (RRIDs) for antibodies, model organisms and tools, where possible.                              | Yes             |

|                                                                                                                                                                                                                                                                                                                                                                                                                                                                                                                                                         |            |
|---------------------------------------------------------------------------------------------------------------------------------------------------------------------------------------------------------------------------------------------------------------------------------------------------------------------------------------------------------------------------------------------------------------------------------------------------------------------------------------------------------------------------------------------------------|------------|
| <p>Have you included the information requested as detailed in our <a href="#">Minimum Standards Reporting Checklist</a>?</p>                                                                                                                                                                                                                                                                                                                                                                                                                            |            |
| <p><b>Availability of data and materials</b></p> <p>All datasets and code on which the conclusions of the paper rely must be either included in your submission or deposited in <a href="#">publicly available repositories</a> (where available and ethically appropriate), referencing such data using a unique identifier in the references and in the “Availability of Data and Materials” section of your manuscript.</p> <p>Have you have met the above requirement as detailed in our <a href="#">Minimum Standards Reporting Checklist</a>?</p> | <p>Yes</p> |

1 **Genome sequencing of deep-sea hydrothermal vent snails reveals adaptations to**  
2 **extreme environments**

3 Xiang Zeng<sup>1†</sup>, Yaolei Zhang<sup>2,3,4†</sup>, Lingfeng Meng<sup>2†</sup>, Guangyi Fan<sup>2,3,6</sup>, Jie Bai<sup>3</sup>, Jianwei  
4 Chen<sup>2</sup>, Yue Song<sup>2</sup>, Inge Seim<sup>7,8</sup>, Congyan Wang<sup>2</sup>, Zenghua Shao<sup>2</sup>, Nanxi Liu<sup>3</sup>, Haorong  
5 Lu<sup>3</sup>, Xiaoteng Fu<sup>1</sup>, Liping Wang<sup>1</sup>, Xin Liu<sup>2,3,5</sup>, Shanshan Liu<sup>2\*</sup>, Zongze Shao<sup>1\*</sup>

7 <sup>1</sup>Key Laboratory of Marine Biogenetic Resources, Third Institute of Oceanography,  
8 Ministry of Natural Resources, No.178 Daxue Road, Xiamen 361005, China.

9 <sup>2</sup>BGI-Qingdao, BGI-Shenzhen, Qingdao 266555, China

10 <sup>3</sup>BGI-Shenzhen, Shenzhen, 518083, China

11 <sup>4</sup>Department of Biotechnology and Biomedicine, Technical University of Denmark,  
12 Lyngby, 2800, Denmark

13 <sup>5</sup>China National GeneBank, BGI-Shenzhen, Shenzhen 518120, China

14 <sup>6</sup>State Key Laboratory of Agricultural Genomics, BGI-Shenzhen, Shenzhen 518083,  
15 China.

16 <sup>7</sup>Integrative Biology Laboratory, College of Life Sciences, Nanjing Normal University, Nanjing,  
17 210046, China

18 <sup>8</sup>Comparative and Endocrine Biology Laboratory, Translational Research Institute-Institute of  
19 Health and Biomedical Innovation, School of Biomedical Sciences, Queensland University of  
20 Technology, Woolloongabba, 4102, Australia

21

22 † These authors contributed equally.

23 \*Correspondence: [shaozz@163.com](mailto:shaozz@163.com) (Z.S.); [liushanshan@genomics.cn](mailto:liushanshan@genomics.cn) (S.L.)

24

25

26

27

28

29

30

31

32

33

34 **Abstract**

35 **Background**

36 The scaly-foot snail (*Chrysomallon squamiferum*) is highly adapted to deep-sea  
37 hydrothermal vents and drew people's interest once it was found. However, the limited  
38 information on its genome impedes related research and understanding of its adaptation  
39 to deep-sea hydrothermal vents.

40 **Findings**

41 Here, we report the whole-genome sequencing and assembly of the scaly-foot snail and  
42 another snail (*Gigantopelta aegi*), which inhabits similar environments. Using ONT, 10X  
43 genomic, and Hi-C technologies, we obtained a chromosome-level genome of *C.*  
44 *squamiferum* with an N50 size of 20.71 Mb. By constructing a phylogenetic tree, we  
45 found that these two deep-sea snails were independent of other snails, and their  
46 divergence from each other occurred approximately 66.3 million years ago. Comparative  
47 genomic analysis showed that different snails have diverse genome sizes and repeat  
48 contents. Deep-sea snails have more DNA transposons and LTRs, but fewer LINEs, than  
49 other snails. Gene family analysis revealed that deep-sea snails experienced stronger  
50 selective pressures than shallow-water snails, and the nervous system, immune system,  
51 metabolism, DNA stability, antioxidation and biomineralization-related gene families  
52 were significantly expanded in scaly-foot snails. We also found 251 class II  
53 histocompatibility antigen H2-Aal, which uniquely exist in the *Gigantopelta aegi* genome,  
54 which is important for investigating the evolution of MHC genes.

55 **Conclusion**

56 Our study provides new insights into deep-sea snail genomes and valuable resources for  
57 further studies.

58

59 **Keywords:** Deep-sea snails; Genome assembly; Comparative genomics;  
60 Biomineralization;

61

62

63

64 **Background**

65 The discovery of deep-sea hydrothermal vents in the late 1970s expanded our  
66 knowledge of the extent of life on Earth [1]. Deep-sea macrobenthos, which are animals  
67 that inhabit deep-sea hydrothermal vents, face high hydrostatic pressure, variable  
68 temperatures and pH, and high levels of hydrogen sulphide, methane, and heavy metals  
69 [2]. To date, the literature contains a limited number of studies on the genetics of  
70 macrobenthos. A recent report on the genome of deep-sea hydrothermal vent/cold seep  
71 mussels (*Bathymodiolus platifrons*) showed that, while most of the genes present in a  
72 related shallow-water mussel (*Modiolus philippinarum*) have been retained, many gene  
73 families have expanded in the *B. platifrons* genome. These include families that are  
74 associated with stabilising protein structures, removing toxic substances from cells, and  
75 the immune response to symbionts [3].

76 Gastropods represent the largest class of the phylum Mollusca, with different  
77 estimates of diversity varying from 80,000 to 150,000 species [4]. More than 218  
78 gastropod (i.e. snail and slugs) species have been described from chemosynthetic  
79 ecosystems (i.e. solely rely on endosymbiotic bacterias for sustenance), of which more  
80 than 138 are believed to be endemic to these ecosystems [5]. Gastropods are an important  
81 component of the fauna in hydrothermal vents in terms of abundance and biomass [6].  
82 Due to the lack of samples and fossil evidence, studies on the evolution and adaptation of  
83 deep sea chemosynthetic gastropods are very limited. The scaly-foot snail (*Chrysomallon*  
84 *squamiferum*) is only found in hydrothermal vents at a depth of ~3,000-metres in the  
85 Indian Ocean. There are two types of varieties without genetic differences: black (due to  
86 greigite, which is an iron sulphide mineral that covers its exterior) scaly-foot individuals  
87 from the Kairei field on the central Indian ridge and Longqi field on the Southwest Indian  
88 ridge, and white scaly-foot individuals from the Solitaire field on the Central Indian  
89 Ridge and the Carlsberg ridge on the Northwest Indian Ridge [7]. *C. squamiferum* was  
90 included in the International Union for Conservation of Nature (IUCN) Red List of  
91 Endangered Species on July 18, 2019 [8]. *Gigantopelta* spp. is a major megafaunal  
92 gastropod genus in some hydrothermal fields. The genus includes two species,  
93 *Gigantopelta chessoia* sp. nov. from East Scotia Ridge and *Gigantopelta aegis* sp. nov.  
94 from the Southwest Indian Ridge [6]. Both *Chrysomallon* and *Gigantopelta* are members

95 of the family Peltospiridae. They live in high-density aggregations and share several  
96 features, such as a large body size (up to > 45 mm, compared to typical sizes in other taxa  
97 of 10-15 mm, a 10-50 fold increase in body volume) and an enlarged oesophageal gland  
98 [9].

99 In this study, we sequenced and analysed chromosome-level genomes of the white  
100 scaly-foot snail *Chrysomallon squamiferum* (*C. squamiferum*, **Figure 1a**) from the  
101 Carlsberg ridge on the Northwest Indian Ridge and *Gigantopelta aegis* (*G. aegis*, **Figure**  
102 **1a**) from the Southwest Indian Ridge. We gained insights into the evolution, gene family  
103 expansions, and adaptations of these extremophile gastropods.

104

## 105 **Data Description**

### 106 **Genome assembly and annotation**

107 The *C. squamiferum* genome was sequenced using a combination of sequencing  
108 libraries – 10X Genomics, Oxford Nanopore Technology (ONT), and Hi-C – to generate  
109 ~369.03 Gb of raw data (**Table S1**). Due to the limited sample material, *G. aegis* was  
110 sequenced from whole genome shotgun libraries (with 350 bp to 10 kb inserts on the  
111 BGISEQ-500 platform) to generate 910.08 Gb of raw data (**Table S2**). The genome of *C.*  
112 *squamiferum* was assembled with long ONT reads by using Canu [10] and WTDBG [11].  
113 After polishing the genome with 10X Genomics sequencing data, a 454.58 Mb assembly  
114 (a little smaller than the estimated genome size: 495 Mb, **Figure S1**) with 6,449 contigs  
115 and an N50 of 541.32 kb was generated (**Table S3**). Next, Hi-C data were used to anchor  
116 the assembly, yielding a 16-chromosome assembly (**Figure 1b**). This effort increased the  
117 N50 size to ~20.71 Mb (**Table 1**). The 16 chromosomes cover ~80% of the whole  
118 genome, and the average length, maximal length, and minimal length of the 16  
119 chromosomes were 22.67, 46.78, and 10.64 Mb, respectively, (**Table S4**). A  
120 Benchmarking Universal Single-Copy Orthologs (BUSCO) completeness score of 94.8%  
121 for this genome suggests that it is of good quality (**Table S5**). This is the first  
122 chromosome-level deep-sea snail genome assembly to date. An approximately 1.29 Gb (a  
123 little smaller than the estimated genome size: 1.50 Gb, **Figure S1**) genome assembly of *G.*  
124 *aegis* with a scaffold N50 of 120.96 kb (**Table S6**) and a BUSCO completeness score of  
125 88.4% (**Table S7**) was obtained using Platanus [12]. After masking repeat elements, we

126 employed homologous and *de novo* prediction methods to construct gene models for the  
127 two genomes, obtaining 28,781 *C. squamiferum* genes and 25,601 *G. aegis* genes (**Tables**  
128 **S8** and **S9**). The gene sets were functionally annotated using KEGG, Swiss-Prot, InterPro,  
129 and TrEMBL (**Tables S10** and **S11**).

130

### 131 **Genome sizes and repeat contents.**

132 The genome assembly sizes of *C. squamiferum* (~455.36 Mb) and *G. aegis* (~1.29 Gb)  
133 add to previous studies on freshwater snails (~916 Mb (*Biomphalaria glabrata*) [13] and  
134 ~440 Mb (*Pomacea canaliculate*) [14]), which suggests that there is significant genome  
135 size diversity within snails (**Figure 1c**). In the absence of ploidy effects [15, 16],  
136 differences in genome size often stem from the accumulation of various repetitive  
137 elements. A comparison of repeat elements (**Figure 1c** and **Table S12**) supports this  
138 contention. The genomes of *C. squamiferum* and *P. canaliculate* (smaller genome sizes)  
139 contained fewer repeats than *B. glabrata* and *G. aegis*, whereas *G. aegis* had more repeats  
140 than *B. glabrata* (**Figure 1d**). This suggests that snail genome sizes correlate with repeat  
141 content. Despite the similar genome sizes of *C. squamiferum* and *P. canaliculate*, their  
142 genome landscapes are distinct. For example, ~10.17% of the *C. squamiferum* genome  
143 consists of tandem repeats compared to ~2.89% in *P. canaliculate* (**Table S12**). DNA  
144 transposons and LTRs comprise ~17.73% and ~5.99% of the *C. squamiferum* genome,  
145 respectively, but only ~6.84% and ~3.53% in *P. canaliculate*. LINES make up ~8.63% of  
146 the *P. canaliculate* genome compared to ~5.65% in *C. squamiferum*. Similarly, although  
147 the larger *G. aegis* and *B. glabrata* genomes have similar proportions of tandem repeats,  
148 *G. aegis* has a higher percentage of DNA transposons (~32.15% versus ~20.20%) and  
149 LTRs (~13.32% versus ~3.75%). LINES make up ~23.93% of the *B. glabrata* genome  
150 compared to ~11.51% in *G. aegis*. Taken together, these data suggest that deep-sea  
151 hydrothermal vent snail genomes have more DNA transposons and LTRs and fewer  
152 LINES than their freshwater counterparts. In particular, DNA/CMC-EnSpm,  
153 DNA/TcMar-Tc1, and DNA/DNA were the main factors that caused the differences in  
154 DNA transposon content in the four snail genomes (**Figure 1d**). We found that LINE/L2,  
155 LINE/RTE-BovB, LINE/LINE, and LINE/CR1 were much higher in fresh-water snail  
156 genomes than in deep-sea snails. Although most of the precise functions of these repeats



157 have not been studied in-depth, repeats have been thought to have a regulatory function  
158 in related genes that play an important role in the life cycle. Thus, we might infer that the  
159 expansion of DNA transposons and LTRs, as well as the abandonment of some LINEs,  
160 may be closely associated with adaptation to extreme environments for deep-sea snails.

161

## 162 **Construction of phylogenetic relationships for deep-sea snails**

163 To determine the phylogenetic relationships between deep-sea snails and other  
164 molluscs, we compared two mussels, two freshwater snails, and two shallow-water snails.  
165 The California two-spot octopus and the freshwater leech *Helobdella robusta* were used  
166 as the outgroup. We identified 26,668 gene families in the ten species examined (**Table**  
167 **S13**). Phylogenetic trees were constructed from 406 shared single-copy orthologs. Both  
168 ML and Bayesian methods revealed the same topology (**Figure 2a** and **Figure S2**), which  
169 is consistent with a recent study [14]. In the tree, mussels and snails are clearly separated  
170 and the two deep-sea snails are located on the same branch and are independent of other  
171 snails (although their genome sizes are quite different). We estimated that *C.*  
172 *squamiferum* and *G. aegis* diverged from a common ancestor approximately 66.3 million  
173 years ago (MYA). This time is consistent with the most recent ‘mass extinction’, at the  
174 end of the Cretaceous geological period ~66 MYA, where ~76% of species became  
175 extinct [17].

176

## 177 **Demographic histories of the deep-sea snails**

178 As the speciation of the two deep-sea snails may be related to geological events (*see*  
179 *above*), we estimated their historical effective population size ( $N_e$ ) using whole-genome  
180 genetic variation. We identified ~3.51 and ~3.19 million heterozygous SNPs with  
181 nucleotide diversities of 0.0077 and 0.0025 for *C. squamiferum* and *G. aegis*, respectively.  
182 We estimated  $N_e$  changes using the pairwise sequential Markovian coalescent (PSMC)  
183 method, which can infer demography from approximately 20,000 to 1 million years ago  
184 (MYA) [18]. The effective population sizes of *C. squamiferum* and *G. aegis* – species  
185 derived from different geographical locations in the Indian Ocean – are distinct (**Figure**  
186 **2b**). The demographic history of *G. aegis* decreased until ~250 KYA (thousand years  
187 ago), followed by an  $N_e$  increase, from ~50,000 to 450,000 individuals, 20,000 years ago.

188 Several cycles of  $N_e$  increase and decrease have been observed for *C. squamiferum*, with  
189 the effective population size recovering and stabilising at 35,000 individuals from 70  
190 KYA onwards. Thus, although deep-sea habitats are inhabited, deep-sea snail populations  
191 are sensitive to habitat disturbances, such as major geological events. Unfortunately, the  
192 *C. squamiferum* population size has dramatically decreased recently due to deep-sea  
193 mining [8], which has made this species endangered.

194

### 195 **Evolution of single-copy orthologous genes**

196 The evolution and expression of single-copy orthologous genes are unique features of  
197 organisms. To explore the evolutionary rate of single-copy orthologous genes, we  
198 calculated the synonymous substitution rate ( $Ka$ ) and nonsynonymous substitution rate  
199 ( $Ks$ ) values of 1,324 single-copy orthologous genes shared by the two deep-sea snails,  
200 one shallow-water snail (*L. gigantea*), and two freshwater snails (*B. glabrata* and *P.*  
201 *canaliculate*) (**Figure 2c**, **Figure S3**, and **Table S15**). We found that the  $Ka$  values of the  
202 two deep-sea snails (average: 0.37 and 0.41) were higher than that of the shallow-water  
203 snail (0.35) but similar to those of two freshwater snails (0.39 and 0.41), which suggests  
204 that the genes of deep-sea and freshwater snails both evolved faster after their divergence  
205 from shallow-water snails. The  $Ks$  values of the deep-sea (3.34 and 3.09) and freshwater  
206 (3.19 and 3.24) snails were also similar and lower than those of the shallow-water snails  
207 (3.72). Additionally, the  $Ka/Ks$  values of the deep-sea snails (average: 0.13 and 0.15)  
208 were approximately ~20% and ~40% higher than those of the shallow-water snails (0.11);  
209 from this we could infer that deep-sea snails have experienced stronger selective  
210 pressures, possibly to allow adaptation to life in hydrothermal vents.

211

### 212 **Expanded gene families in deep-sea snail genomes**

#### 213 *Nervous system*

214 Using CAFÉ [19] (*see details in methods*), we identified two significantly ( $p$ -value <  
215 0.01) expanded gene families in the two deep-sea snail genomes compared to the  
216 freshwater and shallow-water snails. BTB/POZ domain-containing protein 6 (*BTBD6*)  
217 had 56 copies in *C. squamiferum* and 35 copies in *G. aegis*, while fewer than 5 copies  
218 were found in the four other snail species examined (**Figure 3a**). We found 17 *BTBD6*

219 genes on chromosome 16 of *C. squamiferum*, and these genes showed traces of tandem  
220 duplications (**Figure 3b**). In *G. aegis*, we also found several tandem gene clusters  
221 (**Figure 3b**). *HTR4* (5-hydroxytryptamine receptor 4) had 12 copies in *C. squamiferum*  
222 and 18 copies in *G. aegis*, while only one copy was found in the other snail species  
223 (**Figure 3c**). The expansions of these gene families also displayed tandem duplications  
224 (**Figure S4**). Both of these genes have roles in neuroregulation; *BTBD6*, which is an  
225 adaptor of the Cul3 ubiquitin ligase complex, is essential for neural differentiation [20],  
226 while *HTR4* modulates the release of various neurotransmitters[21]. A previous study  
227 revealed that a large unganglionated nervous system exists in *C. squamiferum* [7] (**Figure**  
228 **3d**). We speculate that the expansions of *BTBD6* and *HTR4* contribute to this system by  
229 sustaining life in a deep-sea environment.

230

### 231 *Metabolism related genes*

232 *C. squamiferum* houses abundant endosymbionts in its greatly enlarged oesophageal  
233 gland, and these endosymbionts supply nutrition for its host. KEGG enrichment analysis  
234 on the 183 expanded gene families of *C. squamiferum* revealed significant enrichment  
235 for metabolic pathways ( $q$ -value < 0.0001, **Table S16**). Among these genes, nine gene  
236 families encoded enzymes in the glycolysis pathway and citrate cycle (TCA cycle). For  
237 example, isocitrate dehydrogenase (IDH), which catalyses the oxidative decarboxylation  
238 of isocitrate to produce  $\alpha$ -ketoglutarate and CO<sub>2</sub>, expanded significantly ( $p < 0.01$ ). The  
239  $\alpha$ -ketoglutarate dehydrogenase complex (OGDC) consists of three components:  
240 oxoglutarate dehydrogenase (OGDH), dihydrolipoyl succinyltransferase (DLST), and  
241 dihydrolipoyl dehydrogenase (DLD), among which OGDH expanded ( $p < 0.01$ , **Figure**  
242 **4a**). IDH and OGDC are two rate-limiting enzymes in the TCA cycle, and related  
243 biochemical reactions are irreversible (**Figure 4b**).

244

### 245 *Defence mechanisms*

246 Endosymbiotic bacteria are critical for snail life in deep-sea hydrothermal vent  
247 ecosystems [22]. These bacterial taxa are largely restricted to chemosynthetic  
248 environments, with some being exclusive to vents [23]. The different genome

249 evolutionary processes of *C. squamiferum* and *G. aegis* may generate diverse defence  
250 mechanisms that are used to adapt to different gene evolutions.

251 A total of 183 expanded gene families were identified in the *C. squamiferum* genome.  
252 As expected, many of these have roles in the immune system. However, unlike the  
253 freshwater snail *B. glabrata* [13] and deep-sea mussels [3], we did not detect an  
254 expansion of the Toll-like receptor 13 (*TLR13*) gene family, but identified other  
255 expanded gene families (**Figure 4a**). For example, increased expression of thioredoxin 1  
256 (*Txn1*; 22 copies in *C. squamiferum*) plays a pivotal role in T-cell activation in mice [24].  
257 Although T-cell related adaptive immunity only appears in vertebrates, the existence and  
258 expansion of this gene may assist the innate immune system of *C. squamiferum*.  
259 Glutamine-fructose-6-phosphate transaminase (*GAFT*; 21 copies in *C. squamiferum*)  
260 promotes the biosynthesis of chitin [25, 26], which is one of the stable components of the  
261 crustacean shell, and provides protection against predation and infection.

262 We identified expanded gene families that maintain the stability of nucleic acids and  
263 proteins, such as heat shock protein 90 (Hsp90; 13 copies in *C. squamiferum*, **Figure 4a**),  
264 which protects proteins against heat stress [27]; the single-stranded DNA-binding  
265 proteins, encoded by SSB genes (19 copies in *C. squamiferum*, and 1 copy in other  
266 species, **Figure 4a**), which are required for DNA replication, recombination, and repair  
267 processes [28]; and catalase (*CAT*, 6 copies *C. squamiferum*; **Figure 4c**), which is critical  
268 in the response against oxidative stress [29]. The elevated levels of heavy metals and  
269 sulphide, and high temperatures in hydrothermal vents are likely to greatly increase the  
270 risk of DNA damage and misfolded proteins. Thus, these expanded gene families may  
271 help these snails resist environmental stress.

272 We also found a special gene family, deleted in malignant brain tumours 1 (*DMBT1*),  
273 expanded (70 copies, **Figure 4a**) in the *C. squamiferum* genome. *DMBT1* can encode  
274 three glycoproteins (DMBT1 (deleted in malignant brain tumours 1 protein), SAG  
275 (salivary agglutinin), and GP340 (lung glycoprotein-340)) and belongs to the scavenger  
276 receptor cysteine-rich (SRCR) protein superfamily of the immune system [30]. This gene  
277 consists of the SRCR, CUB, and zona pellucida domains, and all 70 copies of this gene in  
278 *C. squamiferum* contain the SRCR domain, which can bind a broad range of pathogens,  
279 including cariogenic *streptococci*, *Helicobacter pylori*, and HIV [31]. However, previous

280 studies have shown that SRCR domains that contain proteins are commonly expressed in  
281 the shell matrix[32] and have been proven to be potentially linked to  
282 biomineralisation[33], which would be associated with the foot scales of *C. squamiferum*.  
283 Nonetheless, the expansion of this gene family will either strengthen the immune ability  
284 or help construct the scale armour of these snails.

285 Correspondingly, we identified the expansion of 198 gene families (containing 4,515  
286 genes) in the *G. aegis* genome. These families were enriched in 58 KEGG pathways ( $q$ -  
287 value < 0.05) (**Table S17**). The majority of these pathways were associated with the  
288 immune and disease response, and included terms such as ‘infection’, ‘NOD-like receptor  
289 signalling’, ‘Tumour necrosis factor (TNF) signalling pathway’, and ‘Antigen processing  
290 and presentation’ (**Figure S5**). Surprisingly, we found 251 copies of the H-2 class II  
291 histocompatibility antigen, A-U alpha chain-like (H2-Aal) genes, which is one of the  
292 major histocompatibility complex (MHC) genes in vertebrates [34]. The existence and  
293 super expansion of this gene family in an invertebrate positions *G. aegis* as useful for the  
294 study of immune system evolution.

295

## 296 **Discussion**

297 Molluscs are a highly diverse group, and their high biodiversity makes them an  
298 excellent model to address topics such as biogeography, adaptability, and evolutionary  
299 processes [35]. Members of the family Peltospiridae in the gastropod clade Neomphalina  
300 are restricted to chemosynthetic ecosystems and, so far, are only known from hot vents  
301 [6]. Based on the chromosome-scale genome assembly analyses of the scaly-foot snail (*C.*  
302 *squamiferum*) and deep-sea snail (*G. aegi*), which both belong to the Peltospiridae family  
303 from chemosynthetic ecosystems, our results provide insight into the possible evolution  
304 and adaptation mechanisms of hydrothermal vent animals.

305 By constructing a phylogenetic tree, we found that snails diverged from other molluscs  
306 approximately 555.2 MYA (**Figure 2a**). These two deep-sea snails were found to be  
307 independent of other shallow-water snails around 536.6 MYA and diverged from each  
308 other approximately 66.3 MYA. This evolutionary time frame implies that the last  
309 common ancestor of all molluscs (LCAM) already lived before the infamous Cambrian  
310 Explosion (530-540 MYA), which was speculated by the palaeobiological hypothesis

311 [36]. It also elucidated that deep-sea gastropod lineages originated at least around 540  
312 MYA and diverged from other gastropods in the same age of the oldest molluscs taxa,  
313 Aculifera and Conchifera [37, 38]. The deep sea gastropod lineages were also confirmed  
314 by the phylogenetic analysis of mitogenomes [39]. Further conceived by the evolutionary  
315 rate of single-copy orthologous genes, deep sea gastropod lineages have experienced  
316 stronger selective pressures than shallow-water snails (**Figure 2c**). At the end of the  
317 Cretaceous geological period, ~66 MYA, *C. squamiferum* and *G. aegis* diverged from  
318 each other and had different historical effective population sizes ( $N_e$ ) later (**Figure 2b**).  
319 This indicated that they faced different environmental factors and selected pressures.

320 The transposable elements (TEs) play multiple roles in driving genome evolution in  
321 eukaryotes[40]. The genome sizes of four representative snails were quite divergent (440  
322 Mb-1.29 Gb). The deep sea snail *G.aegi* had the largest genome (1.29Gb), with the  
323 highest percentage of DNA transposons (32.15%). Deep sea snails (*C. squamiferum* and  
324 *G.aegi*) had more DNA transposons and LTRs than other snails, but fewer LINES. LTR  
325 class has been identified as the main contributor to open chromatin regions and  
326 transcription factor binding sites[41] [42]. LINES may be associated with the  
327 duplicability of genomic regions, which are always shared between related lineages[43].  
328 It also indicated that the evolution of deep sea snail lineages depends more on adaptive  
329 needs than on a region-specific feature shared between lineages.

330 Specifically, we analysed expanded gene families in deep-sea snail genomes  
331 (**Figure 4a**). They both significantly expanded the nervous system, especially BTB/POZ  
332 domain-containing protein 6 (*BTBD6*) and 5-hydroxytryptamine receptor 4 (*HTR4*),  
333 which are involved in the neuroregulation of activities, such as movement, predation, and  
334 resistance to environmental change. As for the chemosynthetic snails, they both expanded  
335 immune system-related genes. In the *C. squamiferum* genome, the expansions of  
336 thioredoxin 1 (Txn1) and Glutamine-fructose-6-phosphate transaminase (GAFT) were  
337 found. In the *G. aegi* genome, different immune and disease response genes were  
338 expanded; for example, the major histocompatibility complex (MHC) genes, H-2 class II  
339 histocompatibility antigen-like (H2-Aal). These expanded gene families were different  
340 from fresh water snails and deep sea mussels.

341 Interestingly, in the scaly-foot snail (*Chrysomallon squamiferum*) genome, it  
342 significantly enriched the main metabolic pathways, including the glycolysis pathway  
343 and citrate cycle (TCA cycle), expanded the single-stranded DNA-binding protein (*SSB*)  
344 family to stabilise ssDNA, heat shock protein 90 (*Hsp90*) to keep proteins folded  
345 properly, and catalase (*CAT*) to avoid free radical generation by the peroxide. These gene  
346 expansions might have provided deep sea snails with better immune reactions with  
347 symbionts, rapid nerve signal conduction, stronger metabolism, and effective resistance  
348 for adaptation to their hydrothermal vent habitat.

349 In particular, we found that *DMBT1* gene families that encode multiple SRCR domains  
350 expanded significantly. These genes play important roles in immune response and  
351 biomineralisation, both of which are vital for deep sea snails.

352 In conclusion, the genome analysis of deep-sea snails (*Chrysomallon squamiferum*  
353 and *Gigantopelta aegi*) from hydrothermal vents revealed their evolution and different  
354 molecular adaptation to extreme environments and will be a valuable resource for  
355 studying the evolution of invertebrates.

356

357 **Materials and Methods**

358 **Sample collection and DNA isolation**

359 *Chrysomallon squamiferum* samples were obtained from the Daxi hydrothermal field  
360 (60.5°W 6.4°N, 2919m depth) on the Carlsberg Ridge, northwest Indian Ocean, in March  
361 2017 during the Chinese DY38<sup>th</sup> cruise. *Gigantopelta aegis* samples were obtained from  
362 the Longqi vent field (37.8°S, 49.9°E, 2,780 m) on the southwest Indian ridge in March  
363 2015 during the Chinese DY35<sup>th</sup> cruise. DNA was extracted from muscle samples using  
364 the cetyl trimethylammonium bromide (CTAB) method and a DNeasy blood & tissue  
365 kit (QIAGEN). DNA quality and quantity were checked using pulsed field gel  
366 electrophoresis and a Qubit Fluorometer (Thermo Scientific).

367

368 **Libraries preparation and sequencing**

369 ***Whole Genome Shotgun Sequencing***

370 Four WGS libraries were prepared for sequencing: one short insert size library (350 bp)  
371 and three mate-pair large insert size libraries (2 kb, 5 kb, and 10 kb). Libraries were  
372 constructed using an MGI Easy FS DNA Library Prep Set kit (MGI, China). Paired-end  
373 reads (100 bp) and mate-pair reads (50 bp) were obtained from the BGISEQ-500  
374 platform.

375

376 ***10X Genomics sequencing***

377 To prepare the Chromium library, 1 ng of high quality DNA was denatured, spiked into  
378 reaction mix, and mixed with gel beads and emulsification oil to generate droplets within  
379 a Chromium Genome chip. Then, the rest of the steps were completed following the  
380 standard protocols for performing PCR. After PCR, the standard circularisation step for  
381 BGISEQ-500 was carried out, and DNA nanoballs (DNBs) were prepared [44]. Paired-  
382 end reads with a length of 150 bp were generated on the BGISEQ-500 platform.

383

384 ***Oxford Nanopore Technologies***

385 DNA for long-read sequencing was isolated from the muscle tissues of our samples.

386 Using 5 flow cells of the ONT chemistry for the GridION X5 sequencer



387 following manufacturer's protocols, we generated 39.61 Gbp of raw genome sequencing  
388 data.

389

### 390 **Hi-C library and sequencing**

391 The Hi-C library was prepared following the standard *in situ* Hi-C [45] protocol for  
392 muscle samples, using *DpnII* (NEB, Ipswich, America) as the restriction enzyme. After  
393 that, a standard circularisation step was carried out, followed by DNA nanoballs (DNB)  
394 preparation following the standard protocols of the BGISEQ-500 sequencing platform as  
395 previously described [44]. Paired-end reads with a length of 100 bp were generated on  
396 the BGISEQ-500 platform.

397

### 398 **Genome assembly**

399 For the genome assembly of *Chrysomallon squamiferum*, Canu (v1.7) was first used to  
400 perform corrections of ONT reads with the parameters "correctedErrorRate=0.105  
401 corMinCoverage=0 minReadLength=1000 minOverlapLength=800". Then, wtdbg  
402 (v1.2.8) was used to assemble the genome with the parameters "--tidy-reads 3000 -k 0 -p  
403 21 -S 4 --rescue-low-cov-edges" using corrected reads generated by Canu. Next, we  
404 made use of the sequencing reads from the 10X genomic library to carry out genome  
405 polishing using Pilon (version 1.22) with its default parameters. Quality control of Hi-C  
406 sequencing reads was first performed using the HiC-Pro pipeline [46] with the parameters  
407 "[BOWTIE2\_GLOBAL\_OPTIONS = --very-sensitive -L 30 --score-min L,-0.6,-0.2 --  
408 end-to-end --reorder;BOWTIE2\_LOCAL\_OPTIONS = --very-sensitive -L 20 --score-min  
409 L,-0.6,-0.2 --end-to-end --reorder; IGATION\_SITE = GATC; MIN\_FRAG\_SIZE = 100;  
410 MAX\_FRAG\_SIZE = 100000; MIN\_INSERT\_SIZE = 50; MAX\_INSERT\_SIZE =  
411 1500]". In total, 23,646,810 pairs of valid reads were obtained. Next, the valid Hi-C data  
412 was used to anchor the nanopore contigs onto chromosomes separately by applying the  
413 3D-DNA [47] pipeline. The contact maps were then generated by the Juicer pipeline[48],  
414 and the boundaries for each chromosome were manually rectified by visualising the  
415 inter.hic file in Juicebox [49]. 16 chromosomes were identified by combining the linkage  
416 information from the agp file.

417 For the genome assembly of *Gigantopelta aegis*, we only have WGS sequencing reads  
418 because of limited DNA and tissue samples. Platanus (v1.2.4)[12] was used to perform  
419 genome assembly with WGS clean data with the parameters “assemble -k 29 -u 0.2,  
420 scaffold -l 3 -u 0.2 -v 32 -s 32 and gap\_close -s 34 -k 32 -d 5000”. BUSCO (v2) were  
421 used to evaluate genome assemblies with the metazoan\_odb9 database.

422

## 423 **Genome annotation**

### 424 ***Repeat annotation***

425 Homolog-based and *de novo* prediction methods were used to detect repeat contents. In  
426 particular, RepeatMasker (v4.0.5) [50] and RepeatProteinMasker (v 4.0.5) were used to  
427 detect transposable elements against the Repbase database[51] at the nuclear and protein  
428 levels, respectively. RepeatMasker was used again to detect species-specific transposable  
429 elements against databases generated by RepeatModeler (v1.0.8) and LTR-FINDER  
430 (v1.0.6)[52]. Moreover, Tandem Repeat Finder (v4.0.7)[53] was utilised to predict  
431 tandem repeats.

432

### 433 ***Gene annotation***

434 We combined homology-based and *de novo* evidence to predict protein-coding genes in  
435 two genomes. For the homology-based method, we used six relative gene sets of *Aplysia*  
436 *californica*, *Bathymodiolus platifrons*, *Biomphalaria glabrata*, *Lottiu gigantea*, *Modiolus*  
437 *philippinarum*, and *Pomacea canaliculata*. First, these homologous protein sequences  
438 were aligned onto each assembled genome using TBLASTN (RRID:SCR 011822), with  
439 an *E*-value cut-off of  $1 \times 10^{-5}$ , and the alignment hits were linked to candidate gene loci  
440 by GenBlastA [54]. Second, we extracted genomic sequences of candidate gene regions,  
441 including 2 kb flanking sequences, and then used GeneWise (v2.2.0)[55] to determine  
442 gene models.

443

444 In the *de novo* method, we used Augustus (Augustus, RRID:SCR 008417)[56] to predict  
445 the gene models on repeat-masked genome sequences. We selected high-quality genes  
446 with intact open reading frames (ORFs) and the highest GeneWise [55] score from a  
447 homology-based gene set to train Augustus with default parameters before prediction.

448 Gene models with incomplete ORFs and small genes with protein-coding lengths less  
449 than 150 bp were filtered out. Finally, a BLASTP (BLASTP, RRID:SCR 001010) search  
450 of predicted genes was performed against the Swiss-Prot database (UniProt, RRID:SCR  
451 002380) [57]. Genes with matches to Swiss-Prot proteins containing any one of the  
452 following keywords were filtered: transpose, transposon, retrotransposon, retrovirus,  
453 retrotransposon, reverse transcriptase, transposase, and retroviral. Finally, the results of  
454 the homology- and *de novo*-based gene sets were merged using GLEAN to yield a  
455 nonredundant reference gene set.

456

### 457 ***Gene function annotation***

458 We annotated the protein-coding genes by searching against the following public  
459 databases: Swiss-Prot[58], the Kyoto Encyclopedia of Genes and Genomes (KEGG)[59],  
460 InterPro[60], and TrEMBL[58].

461

### 462 **Phylogenetic tree reconstruction and divergence time estimation**

463 The TreeFam tool [61] was used to identify gene families as follows: first, all the protein  
464 sequences from selected 10 representative species (*Aplysia californica*, *Octopus*  
465 *bimaculoides*, *Biomphalaria glabrata*, *Crassostrea gigas*, *Lottia gigantea*, *Pomacea*  
466 *canaliculata*, *Pinctada fucata*, *Chrysomallon squamiferum*, *Gigantopelta aegis*, and  
467 *Helobdella robusta*) were compared using blastp with the *E*-value threshold set as  $1e^{-7}$ .  
468 Then, alignment segments of each protein pair were concatenated using the in-house  
469 software Solar. H-scores were computed based on Bit-scores and were used to evaluate  
470 the similarity among proteins. Finally, gene families were obtained by clustering  
471 homologous gene sequences using Hcluster sg (v0.5.0).

472

473 We obtained 406 one-to-one single-copy orthology gene families based on gene family  
474 classification. Then, these gene families were extracted and aligned using guidance from  
475 amino-acid alignments created using the default parameters of the MUSCLE [62]  
476 programme. All sequence alignments were then concatenated to construct 1 super-matrix  
477 and then a phylogenetic tree was constructed under a GTR+gamma model for nucleotide  
478 sequences using ML and Bayesian methods. The same set of codon sequences were used

479 for phylogenetic tree construction and estimation of divergence time. The PAML  
480 mcmctree programme [63, 64] was used to determine divergence times with the  
481 approximate likelihood calculation method, and the correlated molecular clock and REV  
482 substitution model. The concatenated CDS of one-to-one orthologous genes and the  
483 phylogenomics topology were used as inputs. We used five calibration time points based  
484 on fossil records: *A. californica* - *C. gigas* (~516.3 - 558.3 million years ago (Mya)), *A.*  
485 *californica* - *P. canaliculata* (~310 – 496 Mya), *A. californica* - *Octopus bimaculoides*  
486 (~551 – 628 Mya), *C. gigas* - *H. robusta* (~585 – 790 Mya), and *C. gigas*– *P. fucata*  
487 (394 Mya) (<http://www.timetree.org>), were used as constraints in the MCMCTree  
488 estimation.

489

#### 490 **Expansion and contraction of gene families**

491 We used CAFE (Computational Analysis of gene Family Evolution) v2.1[19] to analyse  
492 gene family expansion and contraction under the maximum likelihood framework. The  
493 gene family results from the TreeFam pipeline and the estimated divergence time  
494 between species were used as inputs. We used the parameters “-p 0.01, -r 10000, -s” to  
495 search for the birth and death parameter ( $\lambda$ ) of gene families, calculated the probability of  
496 each gene family with observed sizes using 10,000 Monte Carlo random samplings, and  
497 reported birth and death parameters in gene families with probabilities less than 0.01.

498

499

500 **Figure legends**

501 **Figure 1. Genome characteristics of *C. squamiferum* and *G. aegis*.** a) Photos of two  
502 species. Left: *C. squamiferum*; right: *G. aegis*. b) Heat map of chromatin interaction  
503 relationships at a 125 kb resolution of 16 chromosomes. c) Genome sizes and  
504 transposable elements in *C. squamiferum*, *G. aegis*, and two representative freshwater  
505 snail genomes. d) Distribution of repeat sub-types of four species.

506

507 **Figure 2. Phylogenetic tree, estimated  $N_e$ , and evolution of single copy orthologous**  
508 **genes of deep-sea snails.** a) Phylogenetic tree of ten representative molluscs. Expanded  
509 and contracted gene families were identified using CAFE. Divergence time was estimated  
510 using mcmctree. Species names in red represent two deep-sea snails. The timescale refers  
511 to the TimeTree database. b) Estimated demographic histories of two deep-sea snails.  
512 The generation time set to “3” refers to the land snail [65]. The  $\mu$  values are calculated  
513 in **Table S15**. c) Box plot of  $K_a/K_s$  values for five snails.

514

515 **Figure 3. Expansion of nervous system-related genes** a) Phylogenetic tree of *BTBD6*  
516 genes in the examined species. The grey ellipses mark different clusters of genes. b)  
517 Expansion pattern of *BTBD6* genes in two deep-sea snails. Grey lines represent scaffold  
518 sequences. Coloured rectangles represent *BTBD6* genes. Symbols “//” represent other  
519 genes along the scaffolds. The blue numbers: “1” represent only one gene between the  
520 tandem duplicated genes. c) Expansion of *HTR4* genes. The species legend in the middle  
521 was used for a and c. Gene trees of a and c were constructed using MUSCLE (v3.8.31)  
522 and FastTree (v2.1.10). d) Sketch map of the large unganglionated nervous system of *C.*  
523 *squamiferum*. The prunosus represents the nervous system. The right amplifying  
524 represents one example of neurotransmitter release.

525

526 **Figure 4. Expansion of immune, metabolism, DNA stability, and antioxidation genes.**  
527 a) Gene numbers of four defence-related genes (*DMBT1*, *GAFT*, *Hsp90*, and *Txn1*), three  
528 metabolism-related genes (*OGDHE1*, *OGDHE2*, and *IDH*), and the *SSB* gene. b) TCA  
529 cycle signal pathway. The brown ellipses represent important enzymes and the expansion

530 of these genes (*OGDHE1*, *OGDHE2*, and *IDH*). **c)** Expansion of the catalase (*CAT*) gene  
531 in selected species.

532

533 **Table 1. Genome assembly and annotation of *Chrysomallon squamiferum* and**  
534 ***Gigantopelta aegis*.**

| Species         | <i>Chrysomallon squamiferum</i> | <i>Gigantopelta aegis</i> |
|-----------------|---------------------------------|---------------------------|
| Genome size     | 455.36 Mb                       | 1.29 GB                   |
| Scaffold N50    | 20.7 Mb                         | 120.96 kb                 |
| Contig N50      | 541.32 kb                       | 6.96 kb                   |
| Number of genes | 28,781                          | 25,601                    |
| Repeat content  | 30.56%                          | 64.17%                    |
| GC content      | 34.48%                          | 37.45%                    |
| Complete BUSCO  | 94.80%                          | 88.40%                    |

535

#### 536 **Data and code availability**

537 The genome assemblies of these two genomes have been deposited in GenBank under the  
538 accession number CNP0000854. The raw sequencing reads were also uploaded to the  
539 SRA database under accession number CNP0000854.

#### 540 **Additional Files**

541 Additional File 1: Supplementary Figures and Tables.docx

542

#### 543 **Author contributions**

544 Z.S., S.L., G.F., and X.L. conceived and managed this project and amended the  
545 manuscript. X.Z., Y.Z., L.M., and I.S. performed the evolutionary analysis and wrote the  
546 manuscript. L.M., J.C., and Y.S. performed genome assembly and annotation. J.B., S.L.,  
547 X.F., C.W., Z.S., H.L., N.L., and L.W. were responsible for sample collection, DNA  
548 extraction, and library construction.

549

#### 550 **Acknowledgments**

551 We thank Dr. Yadong Zhou for providing the animal photographs. We are very grateful  
552 to the RV “Xiangyanghong 9” crew and HOV “Jiaolong” operation teams for helping us  
553 collect samples from the deep-sea hydrothermal vent field. This work was supported by  
554 the National Key R&D Programme of China (No. 2018YFC0310702).

555

## 556 **Supplemental information**

557 Supplemental Information can be found online.

558

## 559 **Declaration of interests**

560 The authors declare that they have no competing interests.

561

## 562 **References**

- 563 1. Corliss JB, Dymond J, Gordon LI, Edmond JM, Von Herzen RP, Ballard RD, et  
564 al. Submarine Thermal Springs on the Galápagos Rift. *Science*. 1979;203  
565 4385:1073-83.
- 566 2. VAN DOVER CL. The ecology of deep-sea hydrothermal vents. Princeton:  
567 Princeton University Press; 2000.
- 568 3. Sun J, Zhang Y, Xu T, Zhang Y, Mu H, Zhang Y, et al. Adaptation to deep-sea  
569 chemosynthetic environments as revealed by mussel genomes. *Nature ecology &  
570 evolution*. 2017;1 5:0121.
- 571 4. Parkhaev PY. The Cambrian ‘basement’ of gastropod evolution. *Geological  
572 Society, London, Special Publications*. 2007;286 1:415-21.
- 573 5. Sasaki T, Warén A, Kano Y, Okutani T and Fujikura K. *Gastropods from Recent  
574 Hot Vents and Cold Seeps: Systematics, Diversity and Life Strategies*. 2010.
- 575 6. Chong C, Linse K, Copley TJ and Rogers DA. The 'scaly-foot gastropod': a new  
576 genus and species of hydrothermal vent-endemic gastropod (Neomphalina:  
577 Peltospiridae) from the Indian Ocean. 2015;81 3:322-34.
- 578 7. Chen C, Copley JT, Linse K and Rogers AD. Low connectivity between ‘scaly-  
579 foot gastropod’ (Mollusca: Peltospiridae) populations at hydrothermal vents on  
580 the Southwest Indian Ridge and the Central Indian Ridge. *Organisms Diversity &  
581 Evolution*. 2015;15 4:663-70.
- 582 8. Sigwart JD, Chen C, Thomas EA, Allcock AL, Bohm M and Seddon M. Red  
583 Listing can protect deep-sea biodiversity. *Nature Ecology and Evolution*. 2019;3  
584 8:1134-.
- 585 9. Chen C, Uematsu K, Linse K and Sigwart JD. By more ways than one: Rapid  
586 convergence at hydrothermal vents shown by 3D anatomical reconstruction of  
587 Gigantopelta (Mollusca: Neomphalina). *BMC Evolutionary Biology*. 2017;17  
588 1:62.

- 589 10. Koren S, Walenz BP, Berlin K, Miller JR, Bergman NH and Phillippy AM. Canu:  
590 scalable and accurate long-read assembly via adaptive k-mer weighting and repeat  
591 separation. *Genome research*. 2017;27 5:722-36.
- 592 11. Ruan J and Li H. Fast and accurate long-read assembly with wtdbg2. *Nature*  
593 *Methods*. 2019:1-4.
- 594 12. Kajitani R, Toshimoto K, Noguchi H, Toyoda A, Ogura Y, Okuno M, et al.  
595 Efficient de novo assembly of highly heterozygous genomes from whole-genome  
596 shotgun short reads. *Genome Res*. 2014;24 8:1384-95.  
597 doi:10.1101/gr.170720.113.
- 598 13. Adema CM, Hillier LW, Jones CS, Loker ES, Knight M, Minx P, et al. Whole  
599 genome analysis of a schistosomiasis-transmitting freshwater snail. *Nature*  
600 *communications*. 2017;8:15451.
- 601 14. Liu C, Zhang Y, Ren Y, Wang H, Li S, Jiang F, et al. The genome of the golden  
602 apple snail *Pomacea canaliculata* provides insight into stress tolerance and  
603 invasive adaptation. *GigaScience*. 2018;7 9:giy101.
- 604 15. Biemont C. Genome size evolution: within-species variation in genome size.  
605 Nature Publishing Group, 2008.
- 606 16. Dehal P and Boore JL. Two rounds of whole genome duplication in the ancestral  
607 vertebrate. *PLoS biology*. 2005;3 10.
- 608 17. Barnosky AD, Matzke N, Tomiya S, Wogan GO, Swartz B, Quental TB, et al. Has  
609 the Earth's sixth mass extinction already arrived? *Nature*. 2011;471 7336:51-7.
- 610 18. Li H and Durbin R. Inference of human population history from individual whole-  
611 genome sequences. *Nature*. 2011;475 7357:493-6.
- 612 19. De Bie T, Cristianini N, Demuth JP and Hahn MW. CAFE: a computational tool  
613 for the study of gene family evolution. *Bioinformatics*. 2006;22 10:1269-71.
- 614 20. Sobieszczuk DF, Poliakov A, Xu Q and Wilkinson DG. A feedback loop mediated  
615 by degradation of an inhibitor is required to initiate neuronal differentiation.  
616 *Genes & development*. 2010;24 2:206-18.
- 617 21. Conductier G, Dusticier N, Lucas G, Côté F, Debonnel G, Daszuta A, et al.  
618 Adaptive changes in serotonin neurons of the raphe nuclei in 5-HT4 receptor  
619 knock-out mouse. *European Journal of Neuroscience*. 2006;24 4:1053-62.
- 620 22. Goffredi SK, Warén A, Orphan VJ, Van Dover CL and Vrijenhoek RC. Novel  
621 forms of structural integration between microbes and a hydrothermal vent  
622 gastropod from the Indian Ocean. *Appl Environ Microbiol*. 2004;70 5:3082-90.
- 623 23. Wolff T. Composition and endemism of the deep-sea hydrothermal vent fauna.  
624 *CBM-Cahiers de Biologie Marine*. 2005;46 2:97-104.
- 625 24. Muri J, Heer S, Matsushita M, Pohlmeier L, Tortola L, Fuhrer T, et al. The  
626 thioredoxin-1 system is essential for fueling DNA synthesis during T-cell  
627 metabolic reprogramming and proliferation. *Nature communications*. 2018;9  
628 1:1851.
- 629 25. Kato N, Dasgupta R, Smartt C and Christensen B. Glucosamine: fructose-6-  
630 phosphate aminotransferase: gene characterization, chitin biosynthesis and  
631 peritrophic matrix formation in *Aedes aegypti*. *Insect molecular biology*. 2002;11  
632 3:207-16.



- 633 26. Lagorce A, Le Berre-Anton V, Aguilar-Uscanga B, Martin-Yken H,  
634 Dagkessamanskaia A and François J. Involvement of GFA1, which encodes  
635 glutamine–fructose-6-phosphate amidotransferase, in the activation of the chitin  
636 synthesis pathway in response to cell-wall defects in *Saccharomyces cerevisiae*.  
637 *European journal of biochemistry*. 2002;269 6:1697-707.
- 638 27. Csermely P, Schnaider T, So C, Prohászka Z and Nardai G. The 90-kDa molecular  
639 chaperone family: structure, function, and clinical applications. A comprehensive  
640 review. *Pharmacology & therapeutics*. 1998;79 2:129-68.
- 641 28. Marceau AH. Functions of single-strand DNA-binding proteins in DNA  
642 replication, recombination, and repair. *Single-Stranded DNA Binding Proteins*.  
643 Springer; 2012. p. 1-21.
- 644 29. Nazıroğlu M. Molecular role of catalase on oxidative stress-induced Ca<sup>2+</sup>  
645 signaling and TRP cation channel activation in nervous system. *Journal of*  
646 *Receptors and Signal Transduction*. 2012;32 3:134-41.
- 647 30. Hohenester E, Sasaki T and Timpl R. Crystal structure of a scavenger receptor  
648 cysteine-rich domain sheds light on an ancient superfamily. *Nature Structural &*  
649 *Molecular Biology*. 1999;6 3:228.
- 650 31. Ligtenberg AJ, Karlsson NG and Veerman EC. Deleted in malignant brain tumors-  
651 1 protein (DMBT1): a pattern recognition receptor with multiple binding sites.  
652 *International journal of molecular sciences*. 2010;11 12:5212-33.
- 653 32. Aguilera F, McDougall C and Degan BM. Co-option and de novo gene evolution  
654 underlie molluscan shell diversity. *Molecular biology and evolution*. 2017;34  
655 4:779-92.
- 656 33. Mann K, Edsinger-Gonzales E and Mann M. In-depth proteomic analysis of a  
657 mollusc shell: acid-soluble and acid-insoluble matrix of the limpet *Lottia*  
658 *gigantea*. *Proteome science*. 2012;10 1:28.
- 659 34. Benoist CO, Mathis DJ, Kanter MR, Williams II VE and McDevitt HO. Regions  
660 of allelic hypervariability in the murine *Aα* immune response gene. *Cell*. 1983;34  
661 1:169-77.
- 662 35. Lindberg DR PW, Haszprunar G. *The Mollusca: Relationships and Patterns*  
663 *from Their First Half-Billion Years*. Oxford: Oxford University Press; 2004.
- 664 36. Wanninger A and Wollesen T. The evolution of molluscs. *Biological Reviews*.  
665 2019;94 1:102-15.
- 666 37. Vinther J. A molecular palaeobiological perspective on aculiferan evolution.  
667 *Journal of natural history*. 2014;48 45-48:2805-23.
- 668 38. Vinther J. The origins of molluscs. *Palaeontology*. 2015;58 1:19-34.
- 669 39. Lee H, Chen W, Puillandre N, Aznarcormano L, Tsai M and Samadi S.  
670 Incorporation of deep-sea and small-sized species provides new insights into  
671 gastropods phylogeny. *Molecular Phylogenetics and Evolution*. 2019;135:136-47.
- 672 40. Kazazian HH. Mobile elements: drivers of genome evolution. *science*. 2004;303  
673 5664:1626-32.
- 674 41. Jacques P-E, Jeyakani J and Bourque G. The majority of primate-specific  
675 regulatory sequences are derived from transposable elements. *PLoS genetics*.  
676 2013;9 5.
- 677 42. Sundaram V, Cheng Y, Ma Z, Li D, Xing X, Edge P, et al. Widespread

678 contribution of transposable elements to the innovation of gene regulatory  
679 networks. *Genome research*. 2014;24 12:1963-76.

680 43. Janoušek V, Laukaitis CM, Yanchukov A and Karn RC. The role of  
681 retrotransposons in gene family expansions in the human and mouse genomes.  
682 *Genome biology and evolution*. 2016;8 9:2632-50.

683 44. Drmanac R, Sparks AB, Callow MJ, Halpern AL, Burns NL, Kermani BG, et al.  
684 Human genome sequencing using unchained base reads on self-assembling DNA  
685 nanoarrays. *Science*. 2010;327 5961:78-81. doi:10.1126/science.1181498.

686 45. Rao SS, Huntley MH, Durand NC, Stamenova EK, Bochkov ID, Robinson JT, et  
687 al. A 3D map of the human genome at kilobase resolution reveals principles of  
688 chromatin looping. *Cell*. 2014;159 7:1665-80. doi:10.1016/j.cell.2014.11.021.

689 46. Servant N, Varoquaux N, Lajoie BR, Viara E, Chen CJ, Vert JP, et al. HiC-Pro: an  
690 optimized and flexible pipeline for Hi-C data processing. *Genome Biol*.  
691 2015;16:259. doi:10.1186/s13059-015-0831-x.

692 47. Dudchenko O, Batra SS, Omer AD, Nyquist SK, Hoeger M, Durand NC, et al. De  
693 novo assembly of the *Aedes aegypti* genome using Hi-C yields chromosome-  
694 length scaffolds. *Science*. 2017;356 6333:92-5. doi:10.1126/science.aal3327.

695 48. Durand NC, Shamim MS, Machol I, Rao SS, Huntley MH, Lander ES, et al.  
696 Juicer Provides a One-Click System for Analyzing Loop-Resolution Hi-C  
697 Experiments. *Cell Syst*. 2016;3 1:95-8. doi:10.1016/j.cels.2016.07.002.

698 49. Durand NC, Robinson JT, Shamim MS, Machol I, Mesirov JP, Lander ES, et al.  
699 Juicebox Provides a Visualization System for Hi-C Contact Maps with Unlimited  
700 Zoom. *Cell Syst*. 2016;3 1:99-101. doi:10.1016/j.cels.2015.07.012.

701 50. Tarailo-Graovac M and Chen N. Using RepeatMasker to identify repetitive  
702 elements in genomic sequences. *Current Protocols in Bioinformatics*. 2009;4.10.  
703 1-4.. 4.

704 51. Jurka J, Kapitonov VV, Pavlicek A, Klonowski P, Kohany O and Walichiewicz J.  
705 Repbase Update, a database of eukaryotic repetitive elements. *Cytogenetic and*  
706 *genome research*. 2005;110 1-4:462-7.

707 52. Xu Z and Wang H. LTR\_FINDER: an efficient tool for the prediction of full-  
708 length LTR retrotransposons. *Nucleic acids research*. 2007;35 suppl 2:W265-W8.

709 53. Benson G. Tandem repeats finder: a program to analyze DNA sequences. *Nucleic*  
710 *acids research*. 1999;27 2:573.

711 54. She R, Chu JS, Wang K, Pei J and Chen N. GenBlastA: enabling BLAST to  
712 identify homologous gene sequences. *Genome Res*. 2009;19 1:143-9.  
713 doi:10.1101/gr.082081.108.

714 55. Birney E, Clamp M and Durbin R. GeneWise and Genomewise. *Genome Res*.  
715 2004;14 5:988-95. doi:10.1101/gr.1865504.

716 56. Keller O, Kollmar M, Stanke M and Waack S. A novel hybrid gene prediction  
717 method employing protein multiple sequence alignments. *Bioinformatics*. 2011;27  
718 6:757-63. doi:10.1093/bioinformatics/btr010.

719 57. UniProt C. UniProt: a worldwide hub of protein knowledge. *Nucleic Acids Res*.  
720 2019;47 D1:D506-D15. doi:10.1093/nar/gky1049.

721 58. Boeckmann B, Bairoch A, Apweiler R, Blatter M-C, Estreicher A, Gasteiger E, et  
722 al. The SWISS-PROT protein knowledgebase and its supplement TrEMBL in  
723 2003. *Nucleic acids research*. 2003;31 1:365-70.

- 724 59. Kanehisa M and Goto S. KEGG: kyoto encyclopedia of genes and genomes.  
725 Nucleic acids research. 2000;28 1:27-30.
- 726 60. Apweiler R, Attwood TK, Bairoch A, Bateman A, Birney E, Biswas M, et al. The  
727 InterPro database, an integrated documentation resource for protein families,  
728 domains and functional sites. Nucleic acids research. 2001;29 1:37-40.
- 729 61. Li H, Coghlan A, Ruan J, Coin LJ, Heriche JK, Osmotherly L, et al. TreeFam: a  
730 curated database of phylogenetic trees of animal gene families. Nucleic Acids  
731 Res. 2006;34 Database issue:D572-80. doi:10.1093/nar/gkj118.
- 732 62. Edgar RC. MUSCLE: multiple sequence alignment with high accuracy and high  
733 throughput. Nucleic Acids Res. 2004;32 5:1792-7. doi:10.1093/nar/gkh340.
- 734 63. Yang Z. PAML 4: phylogenetic analysis by maximum likelihood. Mol Biol Evol.  
735 2007;24 8:1586-91. doi:10.1093/molbev/msm088.
- 736 64. Yang Z and Rannala B. Bayesian estimation of species divergence times under a  
737 molecular clock using multiple fossil calibrations with soft bounds. Mol Biol  
738 Evol. 2006;23 1:212-26. doi:10.1093/molbev/msj024.
- 739 65. Schilthuizen M. Rapid, habitat-related evolution of land snail colour morphs on  
740 reclaimed land. Heredity. 2013;110 3:247-52.
- 741

Figure 1

a

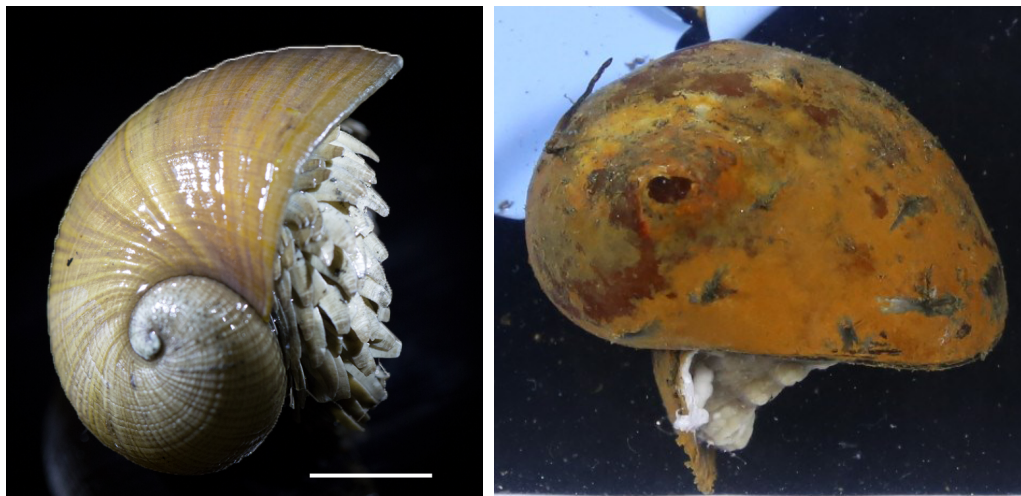*C. squamiferum**G. aegis*

b

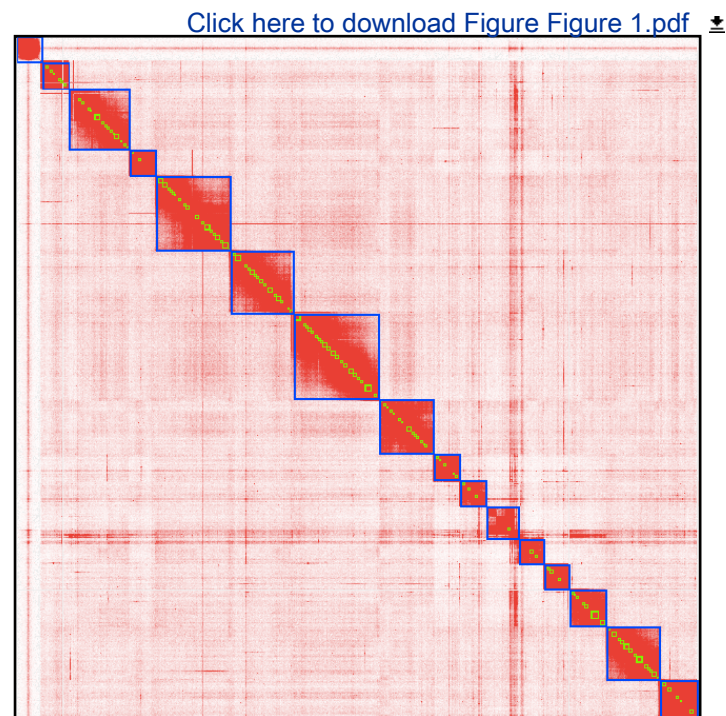

c

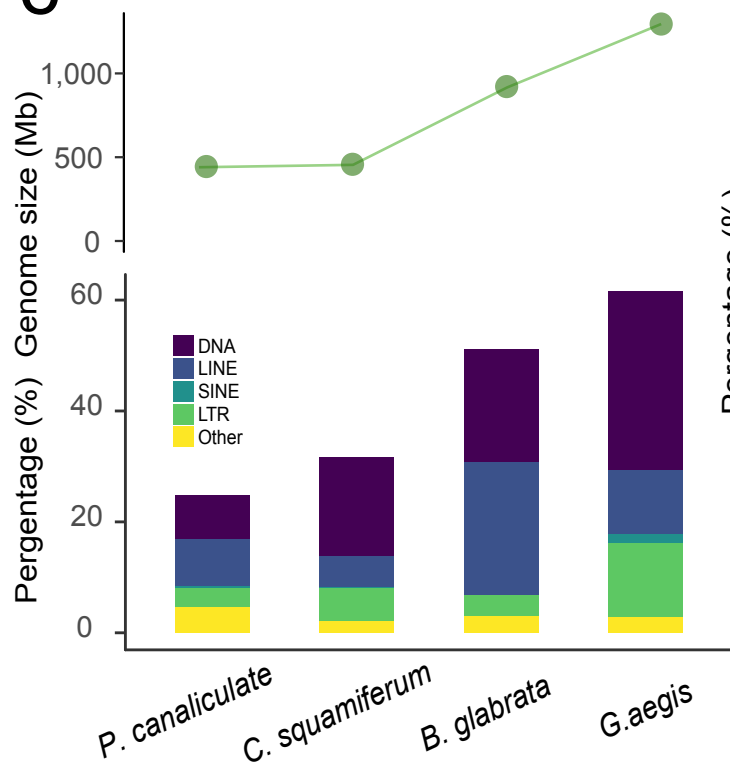

d

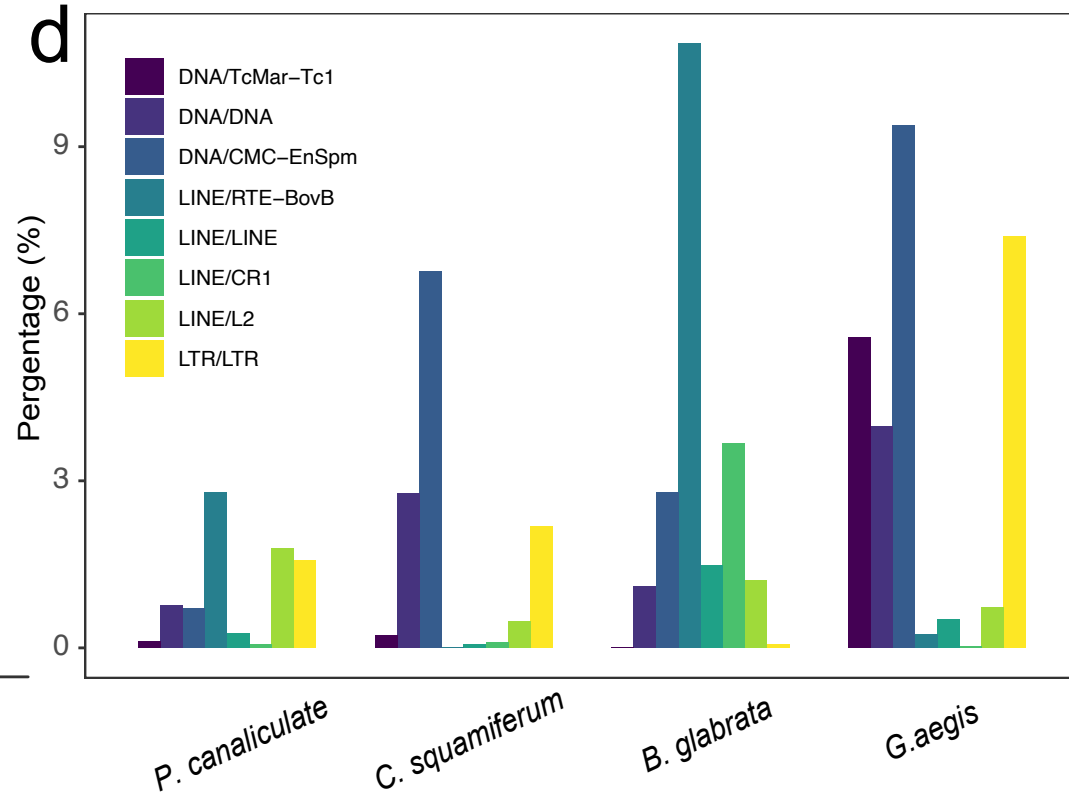

Figure 2

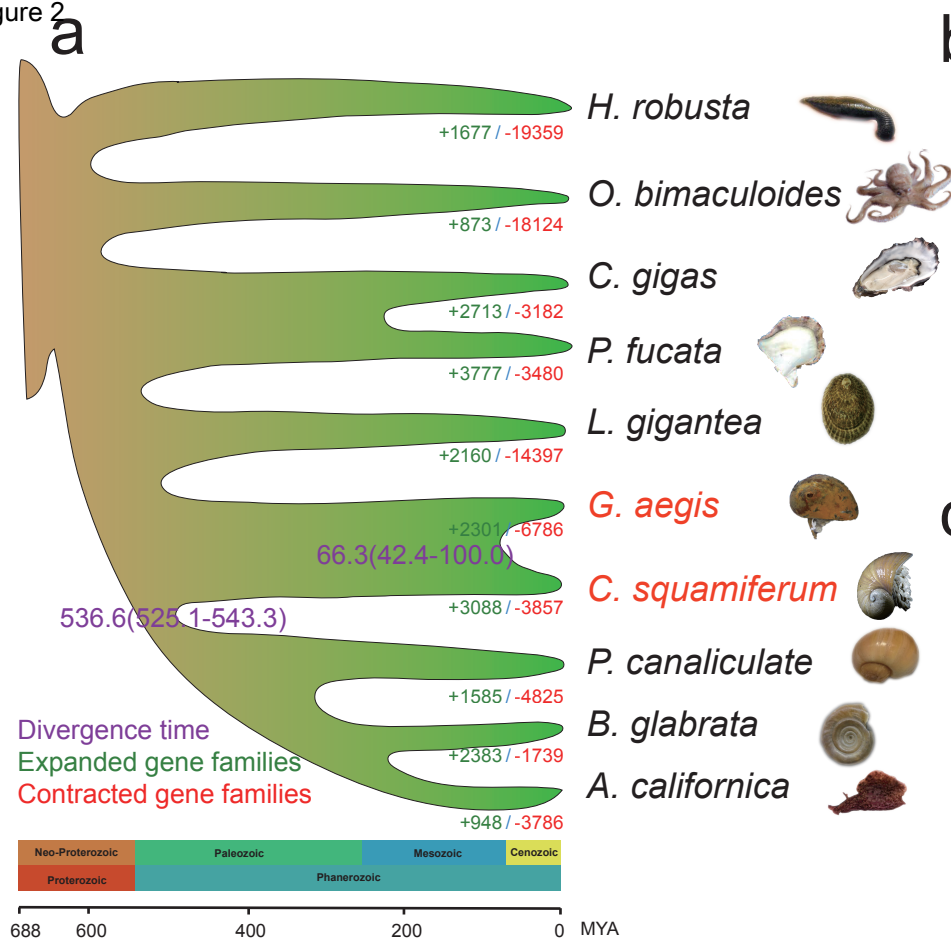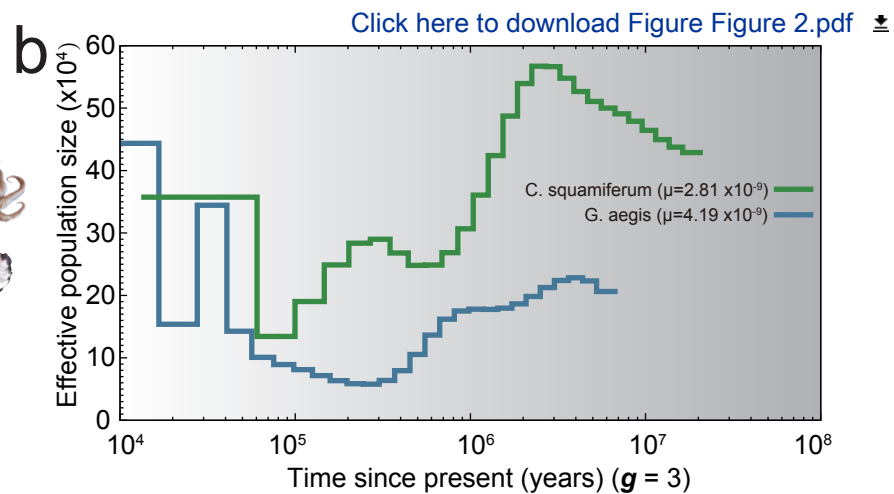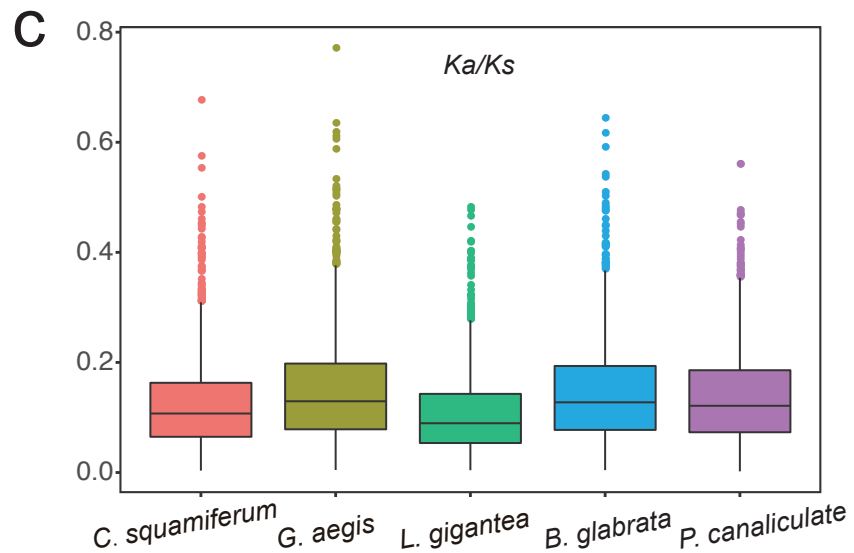

Figure 3

[Click here to download Figure Figure 3.pdf](#)
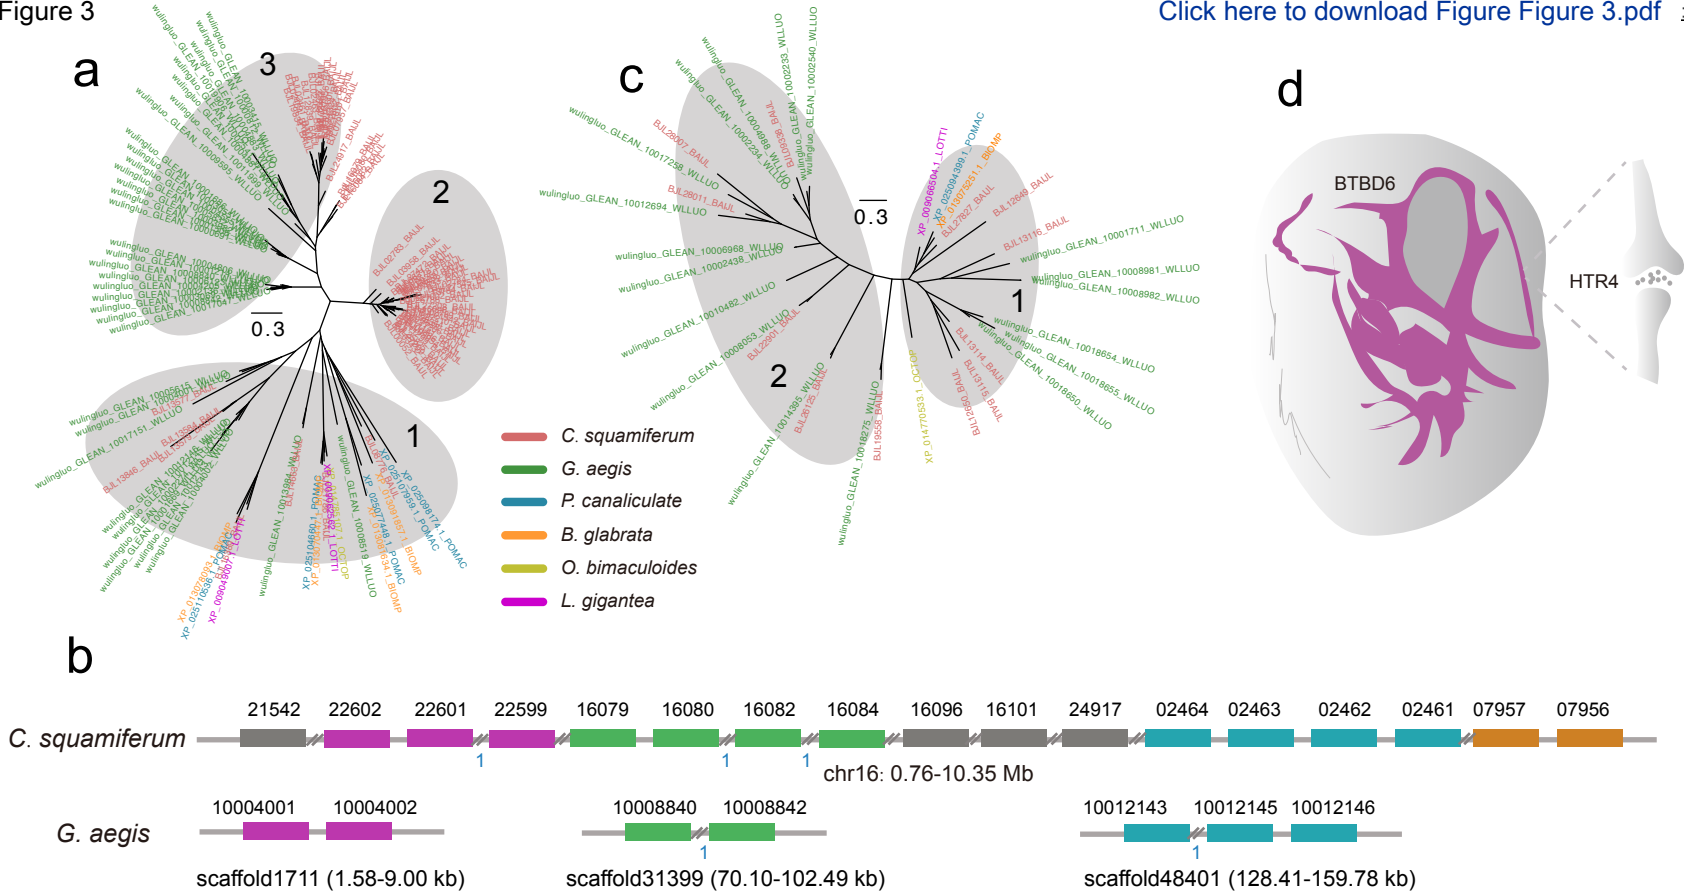

Figure 4

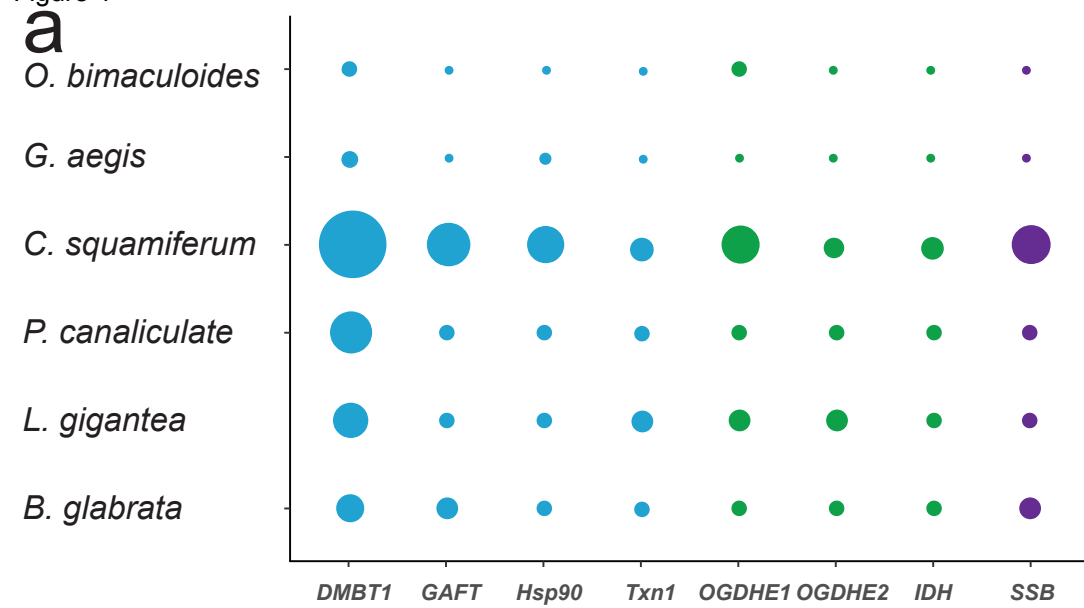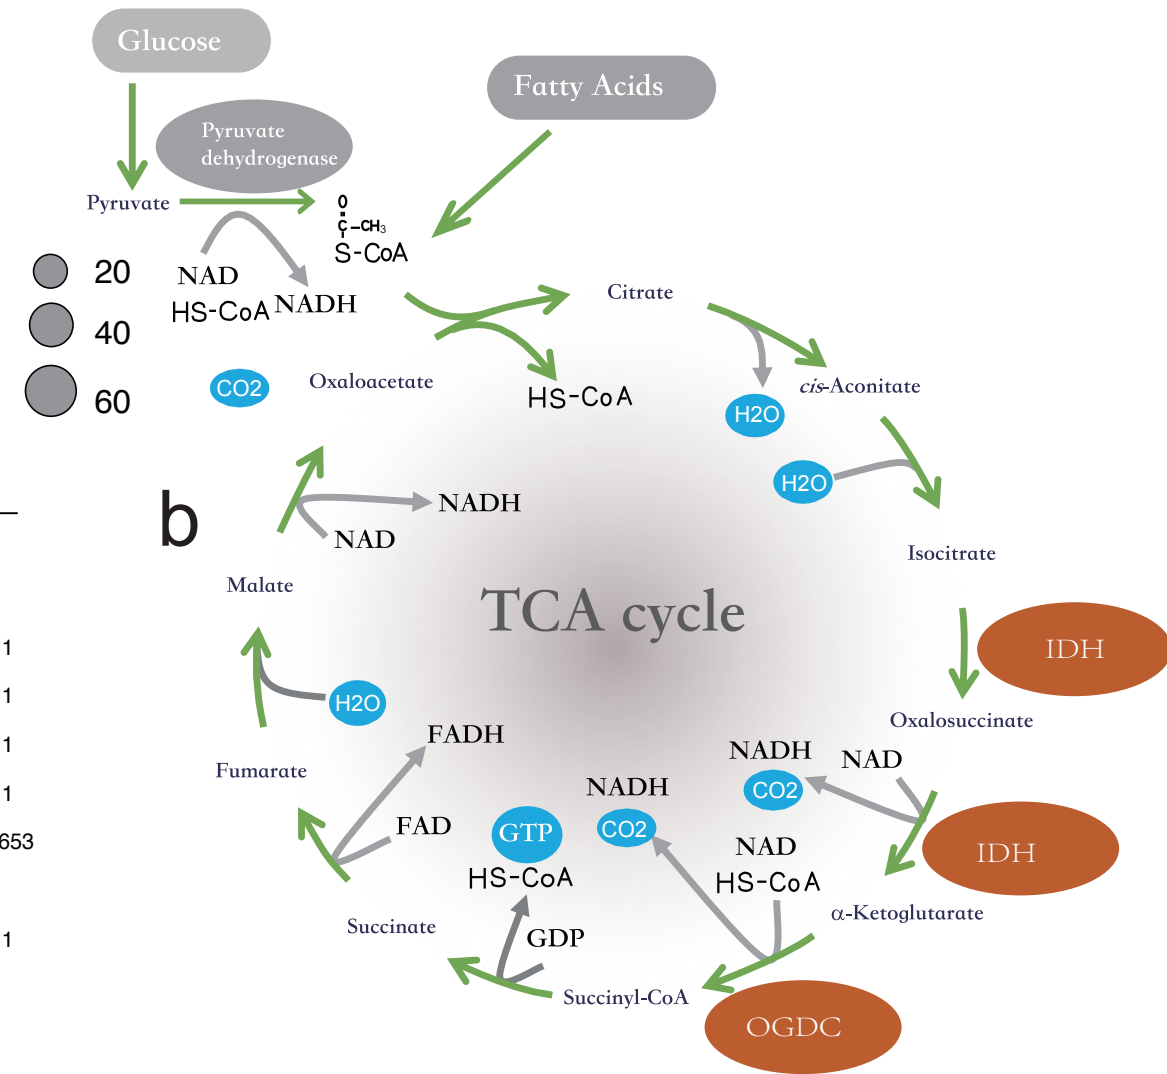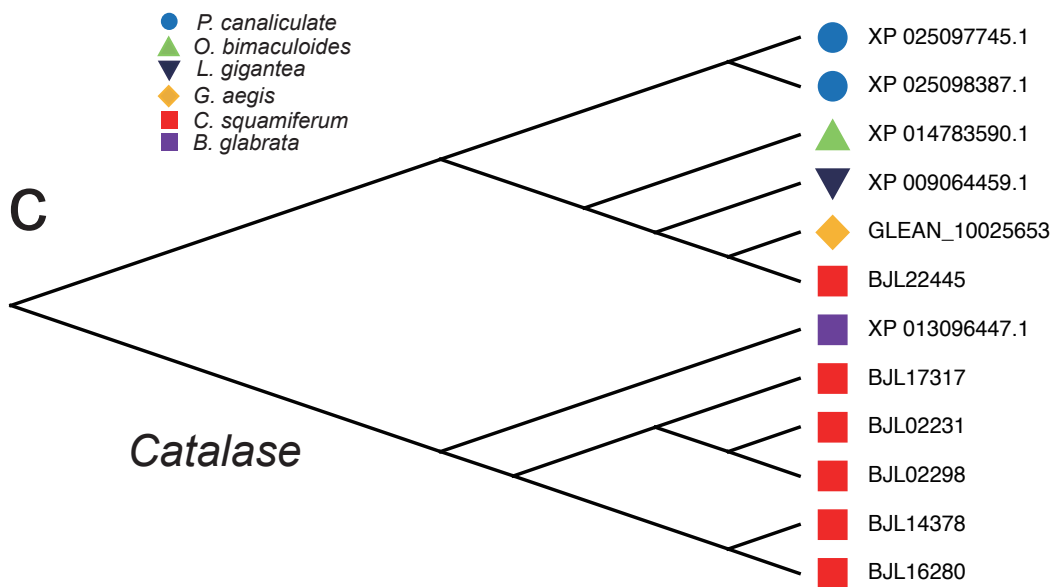

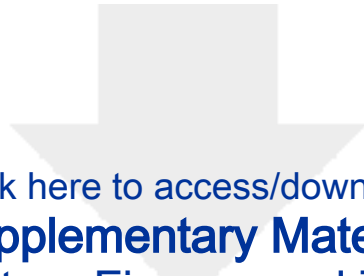

Click here to access/download  
**Supplementary Material**  
Supplementary Figures and Tables.docx

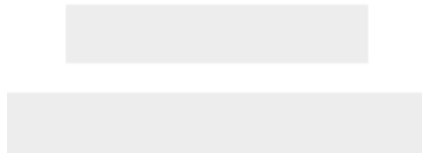

Supplement: giaa139_giga-d-20-00187_original_submission.pdf [file giaa139_giga-d-20-00187_original_submission.pdf]
